# Supplementary material
Source: PubMed Central journal article supplement (PMC5059803)
Supplement: supp_tpc.16.00360_TPC2016-00360-RAR2_Supplemental_Data.pdf [file supp_tpc.16.00360_TPC2016-00360-RAR2_Supplemental_Data.pdf]

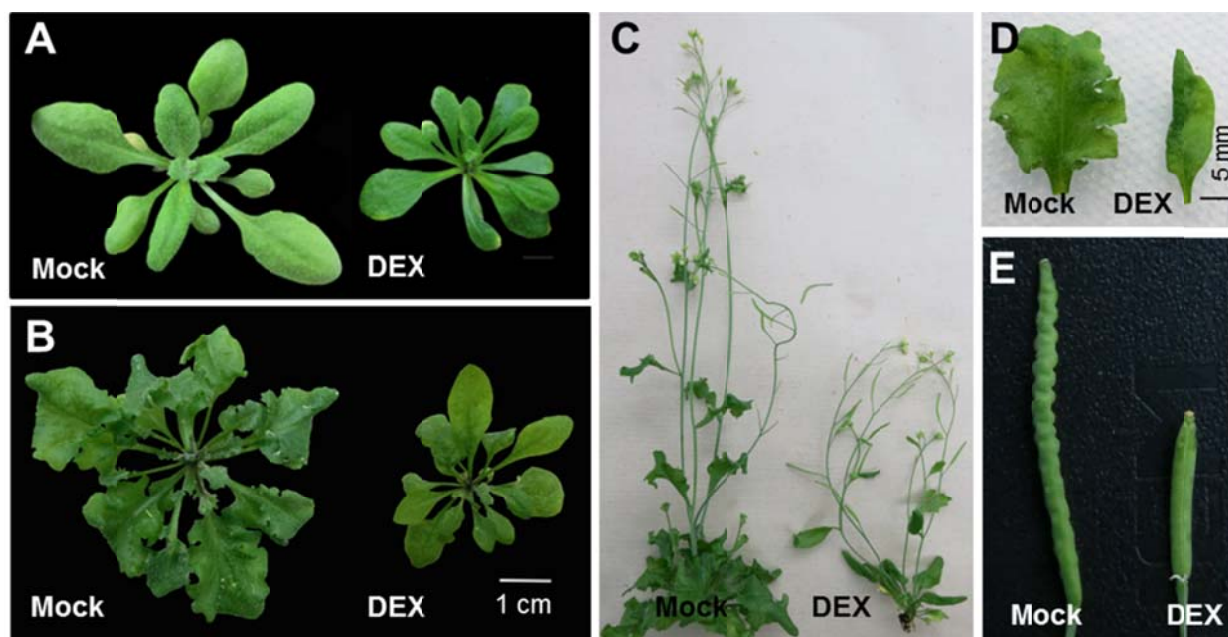

**Supplemental Figure 1. DEX-induced TCP4 activity rescues *jaw-D* phenotypes.** (A) and (B) Rosettes of 32-day-old Col-0;*ProTCP4:mTCP4:GR* plants (A) and *jaw-D;ProTCP4:mTCP4:GR* (B) plants grown in mock or in the presence of 12  $\mu$ M dexamethasone (DEX). (C) to (E) Mock and 12  $\mu$ M DEX-treated *jaw-D;GR* plants highlighting the stem length (C), cauline leaf size (D), and fruit morphology (E).

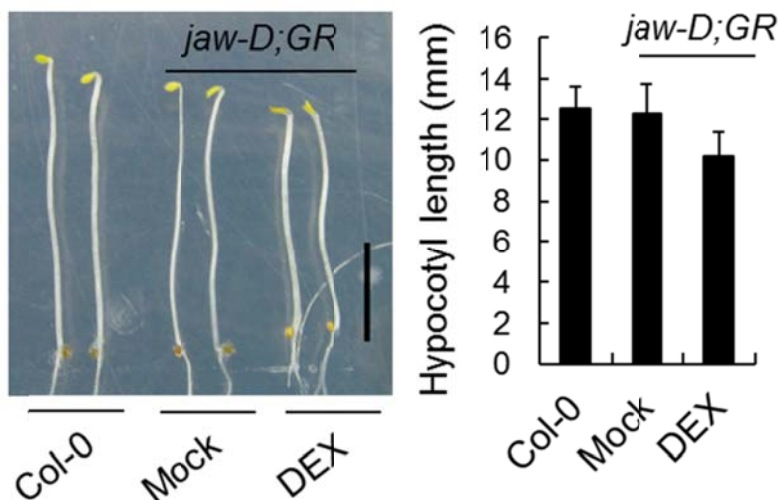

**Supplemental Figure 2. Effect of TCP4 induction on hypocotyl length in seedlings grown in darkness.** Five-day-old *jaw-D;ProTCP4:mTCP4:GR* (*jaw-D;GR*) seedlings of the indicated genotypes were grown in darkness with and without 12  $\mu$ M DEX (left) and their average hypocotyl lengths were recorded (right). Error bars indicate SD; sample number n=12 - 15.

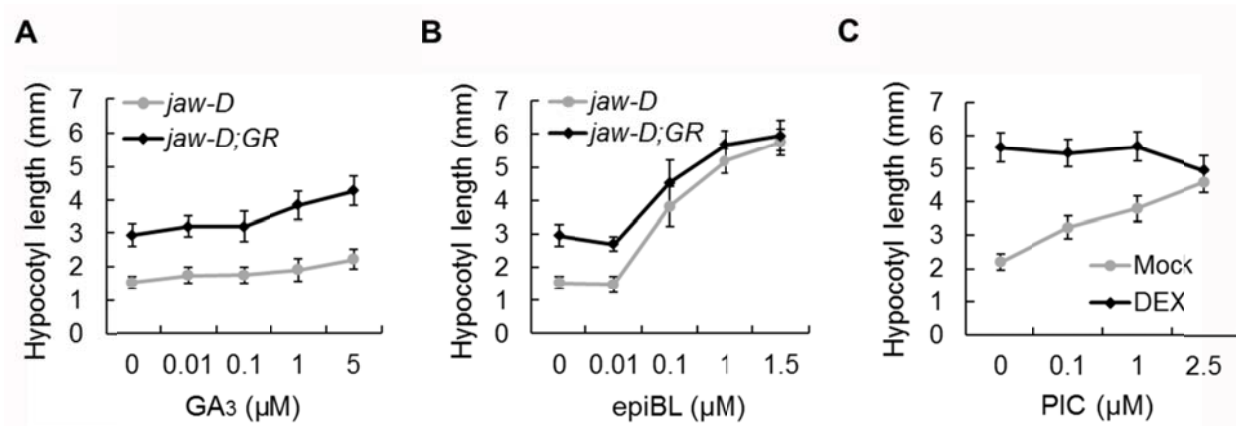

**Supplemental Figure 3. Altered auxin and BR responses in TCP4-mediated hypocotyl elongation.** (A) and (B) average hypocotyl lengths of 7-day-old *jaw-D* and *jaw-D;ProTCP4:mTCP4:GR* (*jaw-D;GR*) seedlings grown with 12 μM DEX and various concentrations of GA<sub>3</sub> (A) and epiBL (B). (C) Average hypocotyl lengths of 7-day-old *Pro35S:mTCP4:GR* seedlings, grown without (Mock) or with (DEX) 12 μM DEX and various concentrations of picloram (PIC). Error bars indicate SD (n=10-15).

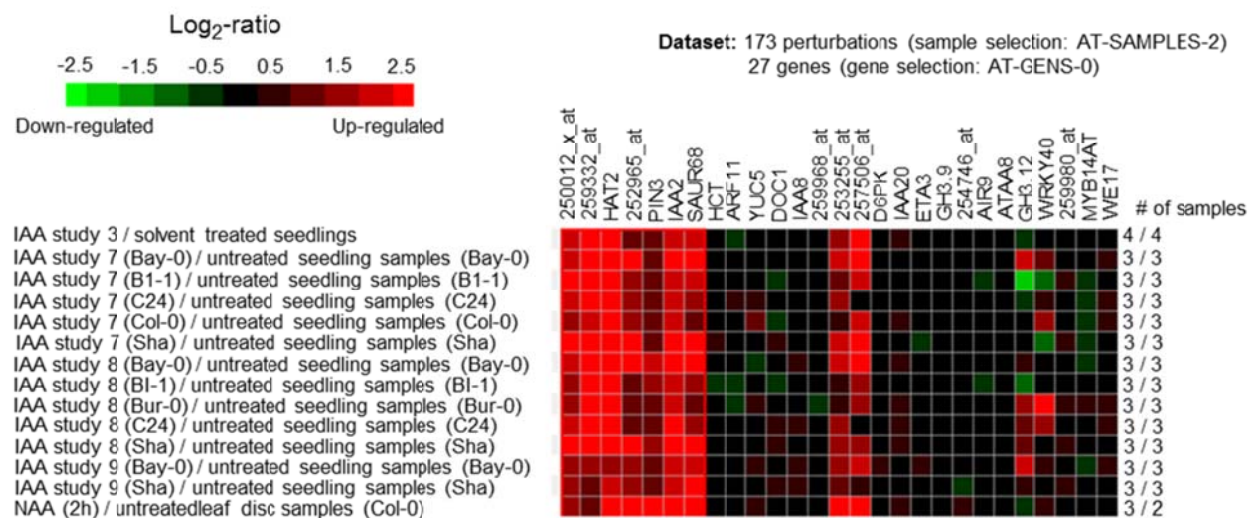

**Supplemental Figure 4. GENEVESTIGATOR analysis of auxin-related genes in the *jaw-D;ProTCP4:mTCP4:GR* microarray.** GENEVESTIGATOR (<https://genevestigator.com/gv/>) analysis comparing the expression levels of the auxin-related genes altered in the microarray experiment on the *jaw-D;ProTCP4:mTCP4:GR* seedlings compared with the previously reported transcriptome profiles of indole acetic acid (IAA)-treated and naphthaleneacetic acid (NAA)-treated seedlings. Top 14 correlated transcriptome profiles of IAA/NAA-treated microarrays are shown. An abridged version of this result is shown in Figure 3.

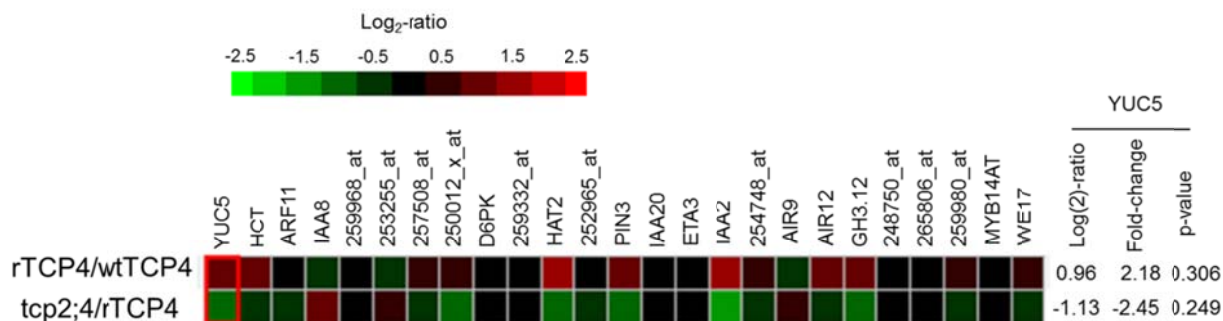

**Supplemental Figure 5. GENEVESTIGATOR analysis of differentially expressed, auxin-related genes in the *jaw-D;ProTCP4:mTCP4:GR* microarray.** Comparison of differentially-expressed, auxin-related genes in the *jaw-D;GR* microarray with those in the *TCP4* microarrays available in the public database using the GENEVESTIGATOR tool (<https://genevestigator.com/gv/>). *YUC5* is indicated with a red rectangle to highlight significant expression difference.

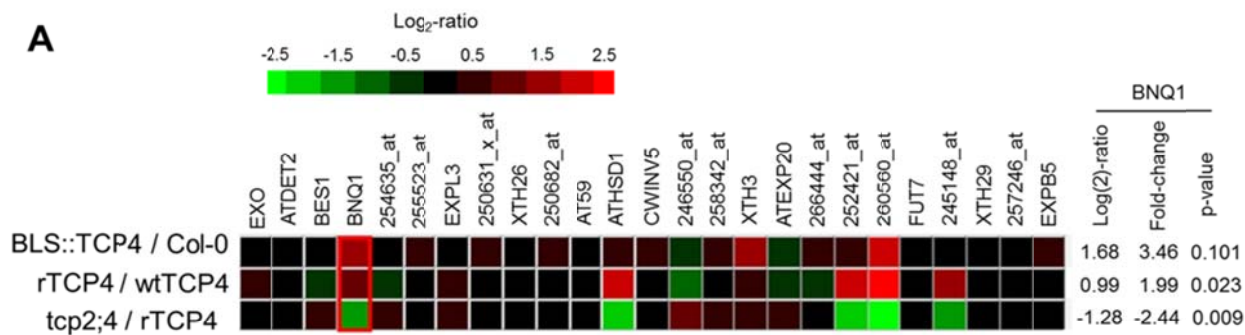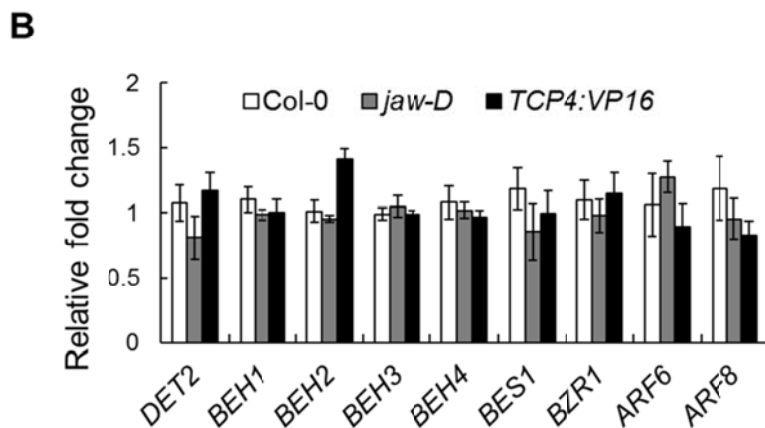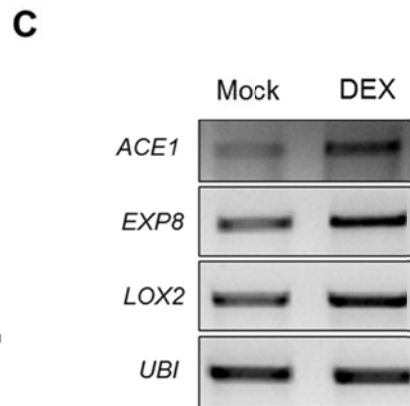

**Supplemental Figure 6. Transcriptional analysis of cell expansion genes in the mutants of *TCP* genes.** (A) Comparison of differentially expressed cell expansion genes in the *jaw-D;GR* microarray with those in previously reported *TCP4* microarrays available in the GENEVESTIGATOR database (<https://genevestigator.com/gv/>). The gene of interest, *BNQ1/PRE1*, is boxed. (B) RT-qPCR analysis of the relative transcript levels of BR biosynthesis/signaling genes in cDNA prepared from 9-day-old seedlings of the indicated genotypes. Transcript levels were normalized to *PP2A* or *TUB2*. Average values from biological triplicates are shown. Error bars indicate SD. (C) RT-PCR analysis of the indicated genes carried out on cDNA samples prepared from 9-day-old *jaw-D;GR* seedlings grown in continuous mock or continuous DEX. *LOX2* is a positive control and *UBI* (*UBIQUITIN10*) is a loading control.

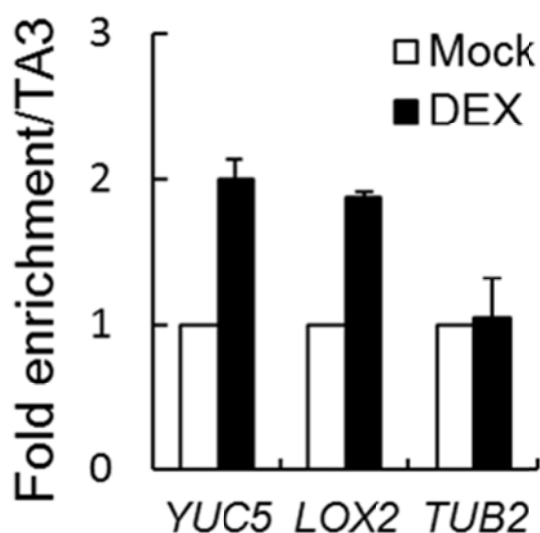

**Supplemental Figure 7. DEX-induced *TCP4* promotes *YUC5* promoter accessibility for transcription *in vivo*.** Quantitative PCR results of the promoter regions of the indicated genes as analyzed by FAIRE experiment. Ten-day old seedlings of *Pro35S:mTCP4:GR* plants were treated with mock and 12  $\mu$ M DEX for 3 h and the *YUC5* promoter was analyzed for accessibility for transcriptional activation. A direct target gene of *TCP4*, *LOX2*, was used as a positive control; *TUB2* was used as a negative control; and *TA3* was used as an internal control. This experiment was repeated twice and one set of representative data is shown. Error bars indicate SD (sample size, 3).

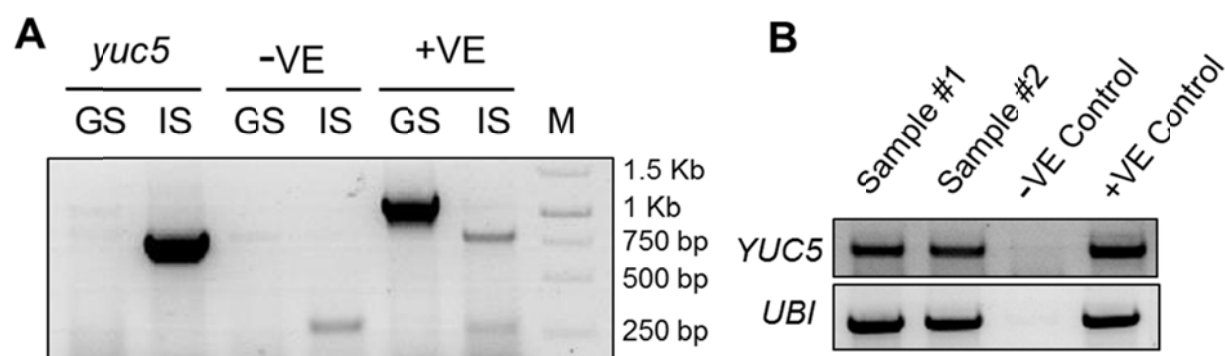

**Supplemental Figure 8. Genotyping and characterization of *yuc5*.** (A) EtBr-stained agarose gel showing the PCR-based genotyping of the *yuc5* T-DNA insertion line. GS indicates gene-specific primer combination; IS indicates T-DNA insertion-specific primer combination. The list of primers for GS and IS is provided in Supplemental Data Set 2, -VE and +VE indicate distilled water and Col-0 genomic DNA, respectively, as PCR templates. M, size markers. (B) RT-PCR analysis of *YUC5* transcript on RNA samples prepared from 9-day-old *jaw-D;ProTCP4:mTCP4:GR;ProDR5:GUS;yuc5* seedlings. *UBIQUITIN (UBI)* was used as the loading control, -VE and +VE indicate distilled water and wild type cDNA, respectively, as templates. Samples #1 and #2 indicate two independent samples used for RT-PCR analysis.

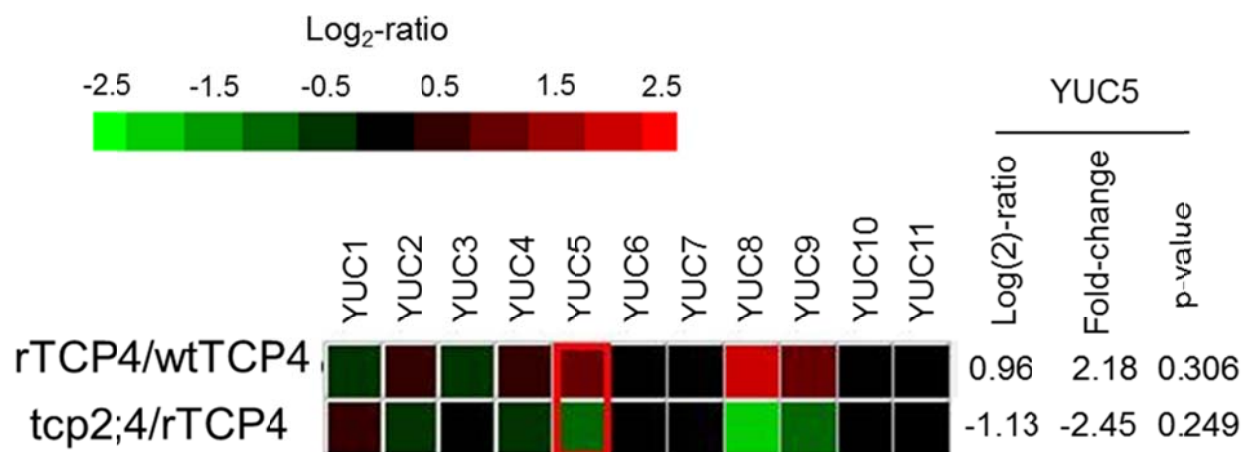

**Supplemental Figure 9. GENEVESTIGATOR (<https://genevestigator.com/gv/>) analysis of *YUC1* to *YUC11* expression in the mutant lines of *TCP* genes. *YUC5* is highlighted by a red box.**



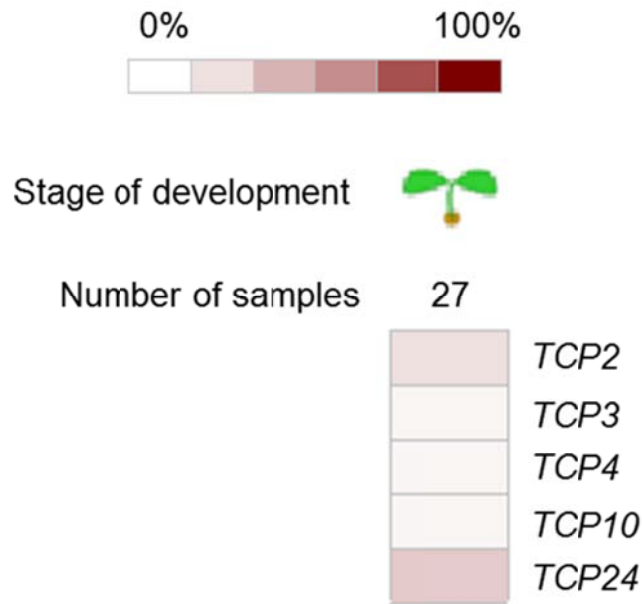

**Supplemental Figure 10. GENEVESTIGATOR analysis of miR319-targeted *TCP* transcripts in wild-type hypocotyl.** Expression analysis of miR319-targeted *TCP*s in publicly available hypocotyl microarrays by GENEVESTIGATOR (<https://genevestigator.com/gv/>). Number of microarray data sets used for this analysis and percentage of expression potential from 0 (white) to 100 (dark brown) are shown.

**Supplemental Table 1. List of auxin-related genes differentially regulated after 2 and 4 h of DEX treatment in the *jaw-D;ProTCP4:mTCP4:GR* microarray.** A 1-kb region upstream of the predicted transcriptional start site was scanned for the presence of TCP4 DNA-binding motifs. The known direct target of TCP4, *LOX2* (Schommer et al., 2008), is highlighted by a dashed rectangle. The transcription start site was defined based on TAIR database information ([www.arabidopsis.org](http://www.arabidopsis.org)). NA indicates not analyzed.

| Gene ID   | Description                 | Fold change after DEX treatment |      | TCP4 DNA-binding motif |         |
|-----------|-----------------------------|---------------------------------|------|------------------------|---------|
|           |                             | 2 h                             | 4 h  | TGGNCC                 | GTGGNCC |
| AT5G43890 | YUCCA5                      | 3.0                             | 3.6  | +                      | -       |
| AT5G48930 | HCT; Auxin homeostasis      | 3.8                             | 2.3  | +                      | -       |
| AT2G46530 | ARF11                       | 3.2                             | 1.7  | -                      | -       |
| AT2G22670 | IAA8                        | 2.5                             | 1.9  | +                      | +       |
| AT1G76530 | Auxin efflux carrier        | 2.3                             | 0.3  | -                      | -       |
| AT4G34760 | SAUR50                      | 2.3                             | 1.7  | +                      | +       |
| AT5G18020 | SAUR20                      | 2.3                             | 1.9  | -                      | -       |
| AT1G29440 | SAUR63                      | 2.2                             | 2.0  | +                      | +       |
| AT5G18030 | SAUR-like                   | 2.0                             | 1.3  | +                      | +       |
| AT5G18060 | SAUR23                      | 2.0                             | 1.3  | -                      | -       |
| AT5G18010 | SAUR19                      | 1.9                             | 1.2  | -                      | -       |
| AT5G55910 | D6PK; Polar auxin transport | 1.8                             | -1.6 | -                      | -       |
| AT5G18050 | SAUR22                      | 1.8                             | 0.9  | -                      | -       |
| AT3G03830 | SAUR28                      | 1.7                             | 0    | +                      | +       |
| AT5G47370 | HAT2                        | 1.7                             | 1.1  | -                      | +       |
| AT4G38860 | SAUR16                      | 1.7                             | 1.1  | +                      | -       |
| AT1G70940 | PIN3                        | 1.6                             | 2.0  | -                      | -       |
| AT2G46990 | IAA20                       | 1.6                             | -0.2 | -                      | +       |
| AT3G23030 | IAA2                        | 1.4                             | 2.1  | -                      | -       |
| AT4G12980 | Auxin-responsive gene       | 1.2                             | 1.6  | +                      | -       |
| AT2G34680 | AIR9                        | 0.5                             | -2.1 | -                      | -       |
| AT3G07390 | AIR12                       | 0                               | -1.7 | -                      | -       |
| AT5G13320 | GH3.12                      | -1.3                            | 2.7  | NA                     | NA      |
| AT5G47530 | Auxin-responsive gene       | -1.7                            | 0    | +                      | -       |
| AT2G18010 | SAUR10                      | -2.2                            | 1.4  | -                      | -       |
| AT1G76520 | Auxin efflux carrier        | -2.3                            | -1.8 | -                      | -       |
| AT2G31180 | MYB14                       | -2.5                            | -2.2 | +                      | -       |
| AT1G25220 | ASB1                        | -2.8                            | -0.2 | +                      | -       |
| AT3G45140 | LOX2                        | 2.5                             | 1.7  | +                      | +       |

**Supplemental Table 2. List of genes known to be involved in cell expansion and differentially expressed after 2 and 4 h of DEX induction in the *jaw-D;ProTCP4:mTCP4:GR* microarray.** The 1-kb region upstream of the predicted transcription start site was used to analyze the TCP4 DNA-binding motif. The transcription start site was defined based on TAIR database information ([www.arabidopsis.org](http://www.arabidopsis.org)).

| Gene ID          | Description                                        | Fold change after DEX treatment |      | TCP4 DNA-binding motif |         |
|------------------|----------------------------------------------------|---------------------------------|------|------------------------|---------|
|                  |                                                    | 2 h                             | 4 h  | TGGNCC                 | GTGGNCC |
| <i>AT4G08950</i> | <i>EXO</i> ; Cell Expansion regulator              | 1.9                             | 2.3  | +                      | -       |
| <i>AT2G38050</i> | <i>DET2</i> ; Cell Expansion regulator             | 1.6                             | 1.9  | -                      | -       |
| <i>AT5G39860</i> | <i>PRE1</i> ; Cell Expansion regulator             | 3.2                             | 0    | -                      | +       |
| <i>AT3G45960</i> | <i>EXLA3</i> ; Cell wall loosening                 | 2.1                             | 0    | -                      | -       |
| <i>AT4G28850</i> | <i>ATXTH26</i> ; Xyloglucosyl transferase          | 1.7                             | -4.4 | -                      | -       |
| <i>AT5G14920</i> | <i>GASA14</i> ; GA mediated cell elongation        | 0                               | -2.5 | +                      | -       |
| <i>AT3G44990</i> | <i>XTH31</i> ; XYLOGLUCAN                          | 0                               | -1.6 | +                      | -       |
| <i>AT4G38210</i> | <i>EXPA20</i> ; Cell wall loosening                | 0                               | 2.0  | +                      | +       |
| <i>AT1G14070</i> | <i>FUT7</i> ; Xyloglucan fucosyltransferase family | -1.9                            | 0    | +                      | -       |
| <i>AT4G18990</i> | <i>XTH29</i> ; Xyloglucan                          | -2.8                            | 0    | -                      | -       |
| <i>AT5G28646</i> | <i>WVD2</i> ; Cell Expansion                       | -2.3                            | -2.8 | +                      | +       |
| <i>AT3G60570</i> | <i>EXPB5</i> ; Cell wall loosening                 | -4.1                            | 0    | -                      | -       |



**Supplemental Table 3. Transcript abundance of YUC genes in TCP mutant lines.**

Transcript abundances of the indicated YUCCA genes in 5-day-old *jaw-D;GR;DR5-GUS* and *jaw-D;GR;DR5-GUS;yuc5* seedlings treated with mock and 12  $\mu$ m DEX. Statistical significance and p-values are shown; ns indicates not significant. Unpaired Student's *t*-test was used.

---

|      |         | <i>jaw-D;GR;<br/>ProDR5:GUS</i> |      |      |        |      |          |      |  |
|------|---------|---------------------------------|------|------|--------|------|----------|------|--|
|      |         | YUC2                            | YUC3 | YUC4 | YUC5   | YUC6 | YUC8     | YUC9 |  |
| Mock | AVER    | 7.04                            | 3.44 | 6.25 | 7.60   | 3.11 | 3.47     | 6.52 |  |
|      | STDEV   | 0.10                            | 0.13 | 0.22 | 0.17   | 0.07 | 0.04     | 0.11 |  |
| DEX  | AVER    | 5.17                            | 3.23 | 6.49 | 5.55   | 3.33 | 2.23     | 7.27 |  |
|      | STDEV   | 0.08                            | 0.08 | 0.19 | 0.19   | 0.03 | 0.08     | 0.35 |  |
|      | p-value | < 0.0001                        | ns   | ns   | 0.0002 | ns   | < 0.0001 | 0.02 |  |

  

|      |         | <i>jaw-D;GR;<br/>ProDR5:GUS;yuc5</i> |      |      |      |      |        |      |  |
|------|---------|--------------------------------------|------|------|------|------|--------|------|--|
|      |         | YUC2                                 | YUC3 | YUC4 | YUC5 | YUC6 | YUC8   | YUC9 |  |
| Mock | AVER    | 7.44                                 | 3.66 | 6.25 | 3.06 | 4.17 | 2.71   | 6.78 |  |
|      | STDEV   | 0.09                                 | 0.11 | 0.14 | 0.07 | 0.05 | 0.16   | 0.29 |  |
| DEX  | AVER    | 5.48                                 | 3.91 | 6.15 | 2.76 | 4.05 | 1.64   | 7.14 |  |
|      | STDEV   | 0.20                                 | 0.14 | 0.09 | 0.21 | 0.07 | 0.11   | 0.20 |  |
|      | p-value | 0.0001                               | ns   | ns   | ns   | ns   | 0.0008 | ns   |  |

---

**Supplemental References**

Schommer, C., Palatnik, J.F., Aggarwal, P., Chetelat, A., Cubas, P., Farmer, E.E., Nath, U., and Weigel, D. (2008). Control of jasmonate biosynthesis and senescence by miR319 targets. *PLoS Biol* **6**, e230.
